# Supplementary material
Source: publisher figshare collection journal article supplement (https://acs.figshare.com/ndownloader/files/20205756)
Supplement: Supplementary file 1 [file 20205756]

# Effect of Char Loading on Reduction Kinetics of Cu-Based Oxygen Carriers in a Drop-Tube Fluidized Bed Reactor at Temperatures from 850° C to 1100° C: Experiment and CFD Modeling

## Supporting Information

*Ward A. Burgess,<sup>\*,a,b</sup> Nicholas C. Means,<sup>a,b</sup> Bret H. Howard,<sup>a</sup> Mark W. Smith,<sup>c</sup> Dushyant  
Shekhawat<sup>c</sup>*

<sup>a</sup> United States Department of Energy, National Energy Technology Laboratory, 626 Cochran  
Mill Road, Pittsburgh, PA 15236, United States

<sup>b</sup> Leidos Research Support Team, 626 Cochran Mill Road, PO Box 10940, Pittsburgh,  
Pennsylvania 15236, United States

<sup>c</sup> National Energy Technology Laboratory, United States Department of Energy, 3610 Collins  
Ferry Road, Morgantown, West Virginia 26507, United States

\*Corresponding Author: E-mail: Ward.Burgess@NETL.DOE.GOV; Tel: 1-412-386-5409

## A1. Mass Transfer Calculations

To obtain a well-functioning CFD model, mass generation rates for each solid and gas species must be properly calculated. The apparent reaction rate constant  $k_x$  defined in Equations S1a and S1b depends on not only the intrinsic (true) reaction rate constant  $k_{rx}$  but also depends on particle surface area  $S$  and external mass transfer coefficient  $k_g$  and effectiveness factor  $\eta$ . Equation S1a should be used when  $k_{rx}$  is in units of  $s^{-1}$ , and Equation S1b should be used when  $k_{rx}$  is in units of  $cm/s$ .

$$\frac{1}{k_x} = \frac{1}{k_g S} + \frac{1}{\eta k_{rx}} \quad (S1a)$$

$$\frac{1}{k_x} = \frac{1}{k_g S} + \frac{1}{\eta k_{rx} S_{BET}} \quad (S1b)$$

To calculate apparent rate constants  $k_4$  and  $k_5$  for coal char combustion reactions 4 and 5 in Table 5 of this paper, it is necessary to know  $k_g$ ,  $S$ ,  $\eta$ ,  $S_{BET}$ ,  $k_{r4}$ , and  $k_{r5}$ . Equation S2 was defined for the external mass transfer coefficient  $k_g$  from the char particles in units of  $cm/s$ .<sup>1</sup> External surface area  $S$  and internal pore surface area  $S_{BET}$  are determined from Tables S1 and S2,  $\eta$  according to Equations S4 through S7 using the values in Table S2, and  $k_{r4}$  and  $k_{r5}$  according to Table 5 in the manuscript. Then, substituting all these values into Equation S1b, the apparent rate constants  $k_4$  and  $k_5$  for Reactions 4 and 5 can be calculated.

$$k_g = \frac{0.75 D_0 P_0}{d_p P} \left( \frac{T_m}{T_0} \right)^{1.75} \quad (S2)$$

Table S1. Variables used in Equations S1 through S7.

| Variable   | Units                            | Definition                                                                                                          |
|------------|----------------------------------|---------------------------------------------------------------------------------------------------------------------|
| $T_m$      | K                                | Mean temperature of boundary layer around particle                                                                  |
| $P$        | bar                              | Pressure                                                                                                            |
| $T_0$      | K                                | Reference temperature (1800 K)                                                                                      |
| $P_0$      | bar                              | Reference pressure (1 bar)                                                                                          |
| $D_0$      | cm <sup>2</sup> /s               | Diffusivity at reference $T_0, P_0$ (4.38 cm <sup>2</sup> /s)                                                       |
| $k_x$      | 1/s                              | Overall rate constant for reaction $x$                                                                              |
| $k_g$      | cm/s                             | external mass transfer coefficient                                                                                  |
| $k_{rx}$   | 1/s                              | intrinsic reaction rate constant for reaction $x$                                                                   |
| $S$        | cm <sup>2</sup> /cm <sup>3</sup> | external particle surface area per unit volume ( $S = 6/d_p$ )                                                      |
| $\eta$     | none                             | effectiveness factor for particle; accounts for mass transfer resistance because of pore diffusion rate limitations |
| $\phi$     | none                             | Thiele modulus                                                                                                      |
| $d_p$      | cm                               | Average particle diameter (0.014 cm for both char and carrier)                                                      |
| $D_e$      | cm <sup>2</sup> /s               | Effective diffusivity of gas through pores of particle                                                              |
| $r_p$      | cm                               | Mean pore radius                                                                                                    |
| $\epsilon$ | none                             | porosity                                                                                                            |
| $S_{BET}$  | cm <sup>2</sup> /cm <sup>3</sup> | Pore surface area per unit volume measured by BET                                                                   |
| $T$        | K                                | Temperature of gas diffusing through pores                                                                          |
| $MW$       | g/mol                            | Molecular weight of diffusing gas                                                                                   |
| $x_{char}$ | none                             | Mass fraction of char in char particles                                                                             |
| $x_{ash}$  | none                             | Mass fraction of ash in char particles                                                                              |

It should be noted that the average diameter of the char particles will decrease as they are consumed by chemical reaction. To account for this decrease in diameter, the value of  $d_p$  for char was multiplied by a relative diameter correction factor  $d_{rel}$ .

$$d_{rel} = \left[ \frac{\frac{x_{char}}{x_{ash}}}{\left(\frac{x_{char}}{x_{ash}}\right)_0} \right]^{\frac{1}{3}} \quad (S3)$$

The effectiveness factor  $\eta$  is calculated as

$$\eta = \frac{3}{\phi^2} (\phi \coth \phi - 1) \quad (\text{S4})$$

The Thiele modulus  $\phi$  is

$$\phi = \frac{d_p}{6} \left( \frac{k_x}{D_e} \right)^{0.5} \quad (\text{S5})$$

$$D_e = 9700 \varepsilon^2 r_p \left( \frac{T}{MW} \right)^{0.5} \quad (\text{S6})$$

In Equation S6, the effective diffusivity  $D_e$  is approximated as equal to the Knudsen diffusivity. The mean pore radius  $r_p$  is calculated with knowledge of the porosity  $\varepsilon$  and BET surface area  $S_{BET}$  of the particle. BET surface areas and porosity values for the CuO, Cu<sub>2</sub>O and C char are given in Table S2. These values were then used in the CFD model for Reactions 1-11 as discussed in the following section.

$$r_p = \frac{2\varepsilon}{S_{BET}} \quad (\text{S7})$$

Table S2. Values for the porosity  $\varepsilon$ , BET pore surface area  $S_{BET}$ , and mean pore radius  $r_p$  for CuO, Cu<sub>2</sub>O, and C used in this work.

|                                               | CuO    | Cu <sub>2</sub> O | C char  |
|-----------------------------------------------|--------|-------------------|---------|
| $\varepsilon$                                 | 0.0122 | 0.00264           | 0.309   |
| $S_{BET}$ (cm <sup>2</sup> /cm <sup>3</sup> ) | 40000  | 10000             | 3610000 |
| $r_p$ (nm)                                    | 6.1    | 5.1               | 1.7     |

For Reactions 1-11, selected values for  $k_g S$  and  $\eta k_r$  are plotted in Figure S1. In Figure S1a the rate constant  $(k_g S)_{CuO}$  for external mass diffusion from CuO/Cu<sub>2</sub>O is 2-3 orders of magnitude higher than the effective reaction rate constants  $\eta k_{r2}$ ,  $\eta k_{r3}$ , and  $\eta k_{r10}$  for Reactions 2,3

and 10; thus resistance to mass transfer because of external mass diffusion resistance can be neglected in these calculations. For all reactions considered in this section,  $k_{rx}$  values were determined from Table 5 while setting average particle diameter  $d_p$  equal to 0.014 cm. The effectiveness factor  $\eta$  was calculated by substituting the values from Table S2 into Equations S4-S7. For Reactions 2, 3, and 10, such calculations yielded the conclusion that in each case the effectiveness factor  $\eta \ll 1$ . Because  $\eta \ll 1$  for Reactions 2, 3 and 10 it is concluded that each of these reactions is controlled by the rate of internal diffusion of the reacting CO gas through the pores of the CuO/Cu<sub>2</sub>O.

From Figure S1b effective reaction rate constant  $\eta k_9 [k_9 = k_{9,1}P_{CO_2}/(1 + k_{9,2}P_{CO_2})]$  for CO<sub>2</sub> gasification Reaction 9 is 6-7 orders of magnitude smaller than the rate constant  $(k_g S)_C$  for external mass diffusion from C char. Preliminary calculations determined that, at the temperature and pressure conditions studied in this work, intrinsic reaction rate for both steam gasification Reaction 7 and CO<sub>2</sub> gasification Reaction 9 is sufficiently slow such that effectiveness factor  $\eta = 1$ . Thus it can be concluded that both of these reactions are controlled solely by the intrinsic kinetics and both external mass diffusion and internal pore diffusion can be neglected in the CFD model for Reactions 7 and 9. However, for the combustion reaction, the calculated values of  $(\eta k)_4$  and  $(k_g S)_C$  are similar over much of the temperature range of interest. Therefore, external diffusion, the intrinsic reaction rate constant, and pore diffusion must be considered in the CFD model to accurately model the combustion reaction kinetics.

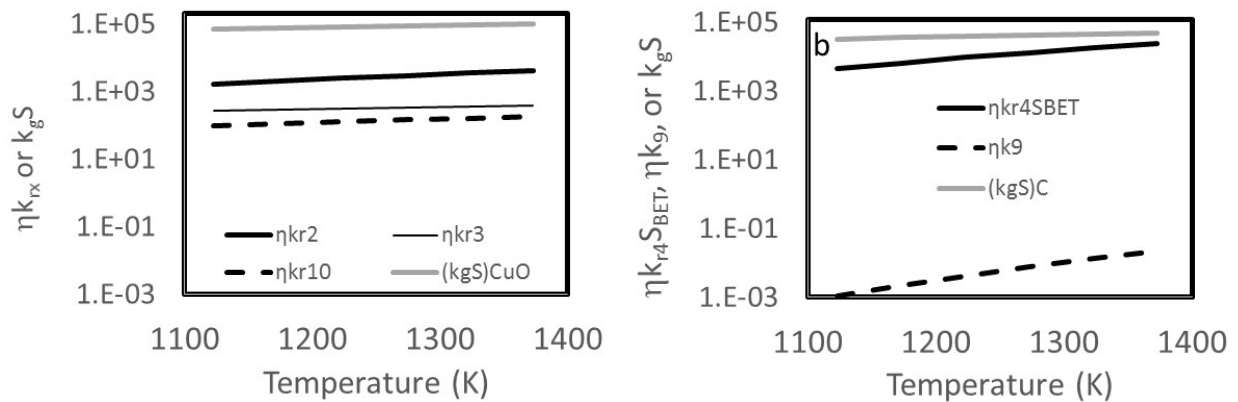

Figure S1. The net chemical reaction rate  $\eta k_{rx}$  is significantly less than the external mass transfer rate  $k_g S$  for CO reduction of CuO reactions 2, 3 and 10 (Table 5 in manuscript) which involve the CuO/Cu<sub>2</sub>O particles (a) but the effective rate constants  $\eta k_{4SBET}$  of combustion reaction and  $(k_g S)_C$  for mass transfer to/from char C particles approach parity as temperature increases (b).

## A.2 Sample Calculation for Overall CuO Reduction Rate Constant $k_{ov}(T)$

To calculate  $k_{ov}$ , the full O<sub>2</sub>, CO<sub>2</sub>, and CO elution curve data set for a reaction must first be available. For the reduction of CuO at 900° C and C:O ratio of 0.075, the associated gas elution curves are plotted in Figure S2. At these reaction conditions almost all of the eluting gas is CO<sub>2</sub>, with very small amounts of CO and O<sub>2</sub> present. The O<sub>2</sub> released from the reduction of CuO subsequently reacts with PRB char (denoted as C<sub>(s)</sub> in Figure S2) to form CO<sub>2</sub> and CO. Almost all the CO formed during the combustion process is oxidized to CO<sub>2</sub>, by reaction with either O<sub>2</sub> or CuO. In Region 1 of Figure S2, the rate of CO<sub>2</sub> production is high and its concentration in the purge gas rises up to 1.5% by volume. However, at approximately 60 seconds, the CO<sub>2</sub> response drops rapidly and the O<sub>2</sub> response goes to zero. Because O<sub>2</sub> no longer reacts with char or CO to form CO<sub>2</sub> in the purge gas, the concentration of CO<sub>2</sub> falls sharply. At this point, it can be concluded that the CLOU reaction is nearly complete and therefore CuO composition of the carrier is negligible. The gas composition after 60 seconds in Region 2 of Figure S2 primarily arises from the undesired over-reduction of Cu<sub>2</sub>O to Cu, which is fortunately limited by the rate of CO production from the relatively slow gasification and Cu<sub>2</sub>O-char reactions at 900° C. Ultimately, the reaction dies and CO, CO<sub>2</sub> and O<sub>2</sub> compositions go to zero.

The  $X$  curve was calculated in the following manner. First, the volumetric flow rate of CO, CO<sub>2</sub>, and O<sub>2</sub> with respect to time was calculated from the known purge gas flow rate of 1 standard L/min and the composition data shown in Figure S2. Next, these volumetric flow rates were used to calculate the molar flow rates of CO, CO<sub>2</sub> and O<sub>2</sub> with respect to time. From these molar flow rates, the total moles of oxygen  $n_o(t)$  in the eluting gas and the total moles oxygen eluted  $n_{of}$  at end of reaction were then determined. Finally, the  $X$  curve was calculated according to Equation 15 in the manuscript. It is plotted in Figure S2.

Most of the total gas elution arises before 60 seconds, as the value of  $X$  at this time is approximately 0.9. Therefore, it is assumed that the vast majority of the gas eluted is associated with the reduction of CuO and that an overall CuO reduction rate constant  $k_{ov}$  can be determined from the  $X$  data. The shrinking sphere relationship  $g(X) = 1 - (1 - X)^{1/3}$  is plotted versus time up to 60 seconds to obtain an approximate, overall kinetic rate constant for the reduction of CuO. This result is plotted in Figure S3. In Figure S3,  $g(X)$  begins to rise above 0 only after approximately 3 seconds, indicating that reaction just begins at about that time. The reason for this observation is that a very short time is needed for the carrier-char mixture to approach

reactor temperature after it is dropped into the reactor. Therefore, in Figure S3 the plot of  $g(X)$  vs  $t$  is not constrained to go through the origin.

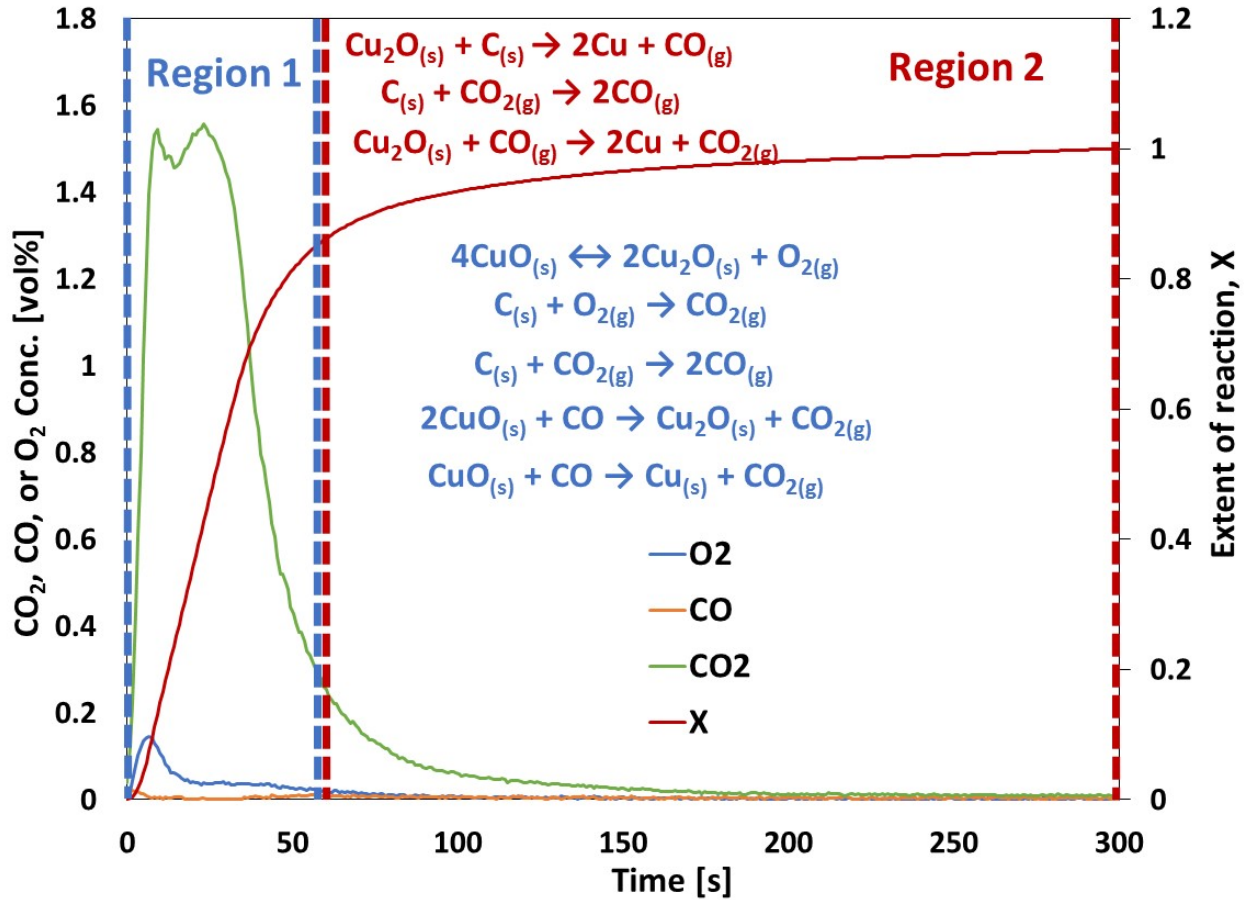

Figure S2. CO, CO<sub>2</sub>, and O<sub>2</sub> gas elution curves for the reduction of CuO at 900° C with a C:O = 0.075. The extent of reaction  $X$  with respect to moles oxygen eluted is also plotted.

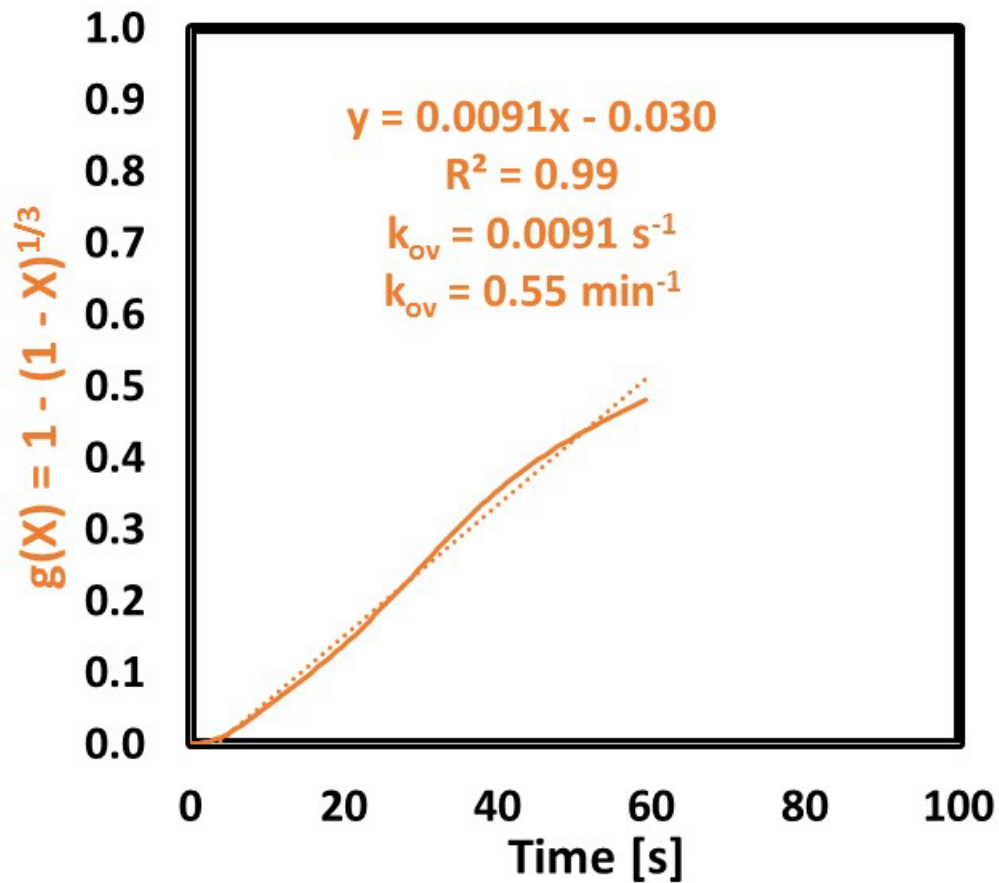

Figure S3. The overall CuO reduction rate constant  $k_{ov}$  is obtained from a plot of  $g(X) = 1 - (1 - X)^{1/3}$  versus time.



### A.3 Validation of Kinetic Model

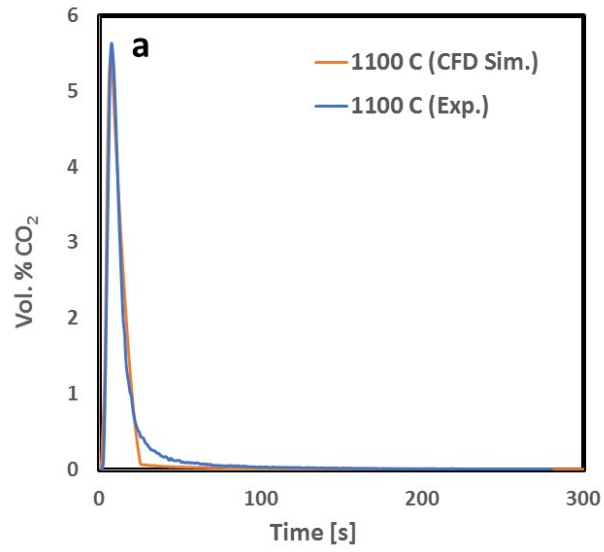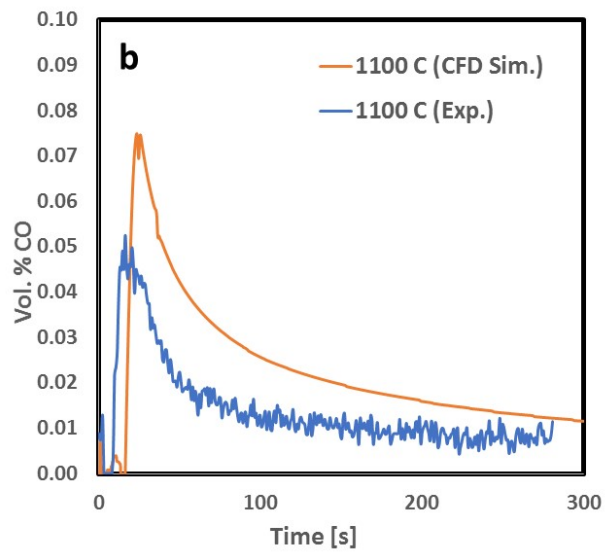

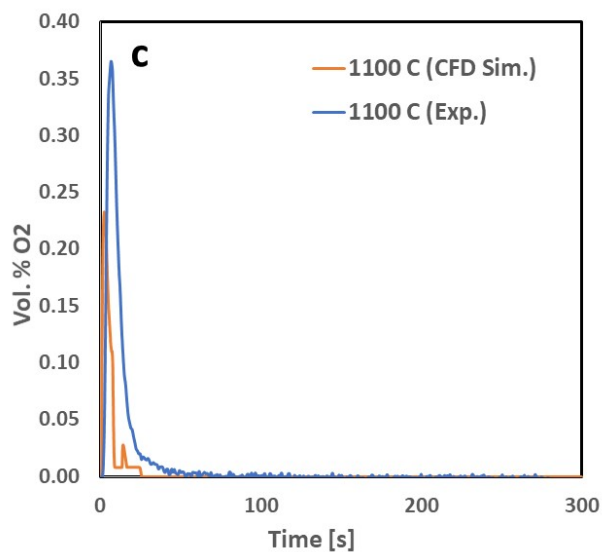

Figure S4. Comparison, for Mixed carrier, of experimentally obtained and predicted gas elution curves for (a) CO<sub>2</sub>, (b) CO, and (c) O<sub>2</sub> at T = 1100° C and a C:O feed ratio of 0.075.

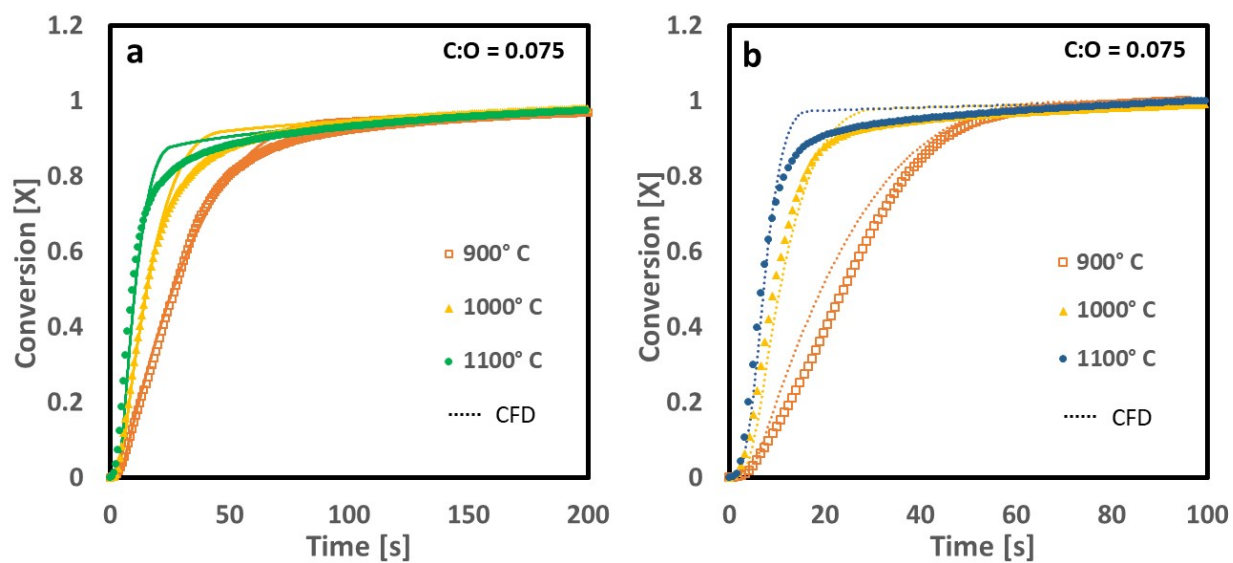

Figure S5. CFD predictions closely match  $X$  calculated from experimental gas elution data for (a) Mixed and (b) IWI carriers.

#### A4. Variation of O<sub>2</sub> Uncoupling, CO reduction of CuO, Combustion and Gasification Reaction Rates with Respect to C:O Ratio

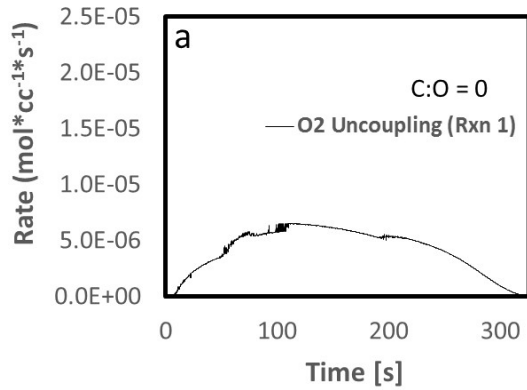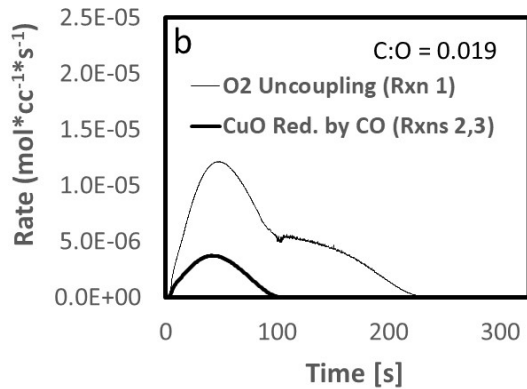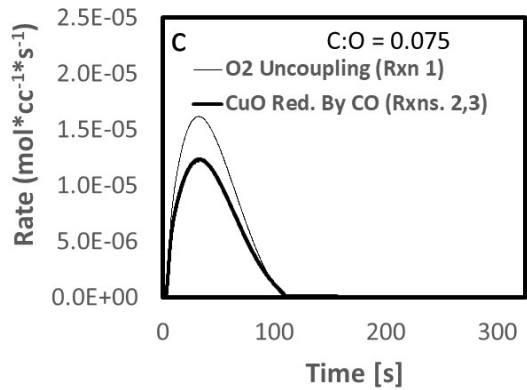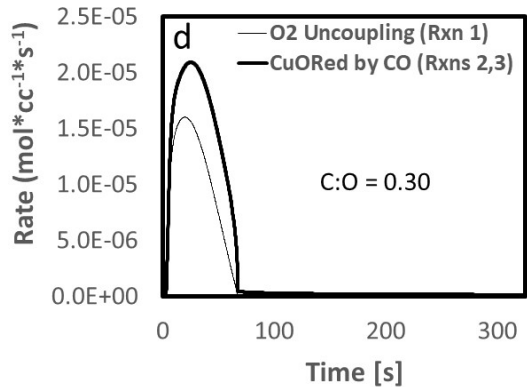

Figure S6. CFD predictions for CuO reduction rates broken down into O<sub>2</sub> uncoupling and reduction of CuO by CO for C:O ratio of (a) 0, (b) 0.019, (c) 0.075 and (d) 0.30.

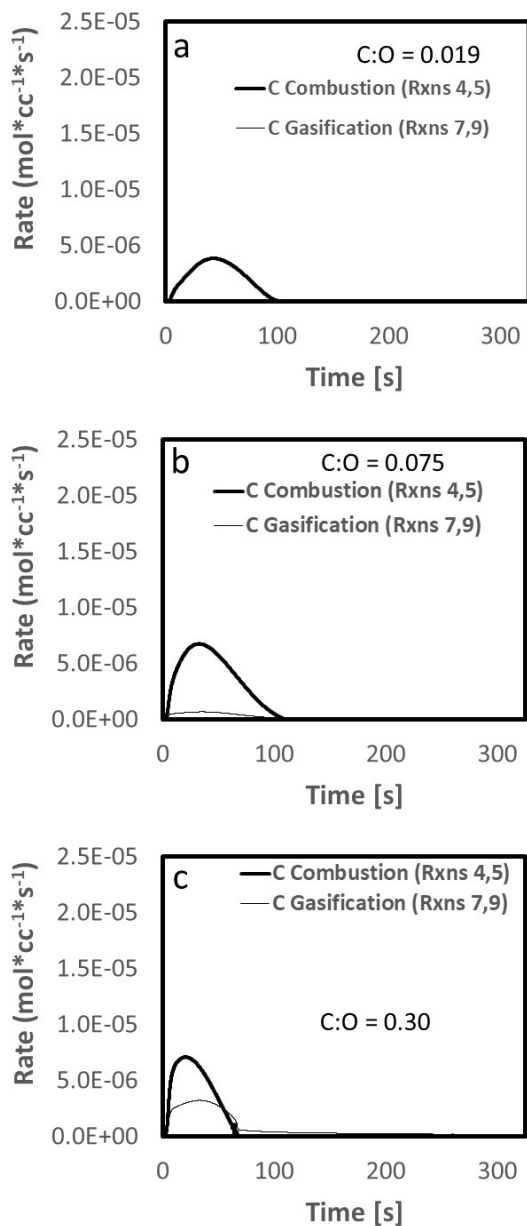

Figure S7. CFD predictions for C reaction rates broken down into combustion and gasification for C:O ratio of (a) 0.019, (b) 0.075 and (c) 0.30. The primary mode of reaction of PRB char is by combustion, but at higher C:O ratios some gasification of PRB char also occurs.

---

<sup>1</sup> Smith, I. W. The Combustion Rates of Coal Chars: A Review. Nineteenth Symposium International on Combustion/The Combustion Institute, 1982. 1045-1065.
